# Supplementary material
Source: ML conference proceedings conference paper supplement (https://proceedings.neurips.cc/paper_files/paper/2019/hash/15825aee15eb335cc13f9b559f166ee8-Abstract.html)
Supplement: Supplementary file [file 15825aee15eb335cc13f9b559f166ee8-Supplemental.zip]

|             | M=20           | M=50                             | M=100                            |  | M=20           | M=50                            | M=100                           |
|-------------|----------------|----------------------------------|----------------------------------|--|----------------|---------------------------------|---------------------------------|
| iid online  | 86.8 $\pm$ 1.1 | 86.8 $\pm$ 1.1                   | 86.8 $\pm$ 1.1                   |  | N/A            | N/A                             | N/A                             |
| iid offline | 86.8 $\pm$ 1.1 | 86.8 $\pm$ 1.1                   | 86.8 $\pm$ 1.1                   |  | N/A            | N/A                             | N/A                             |
| single      | 19 $\pm$ 0.2   | 19 $\pm$ 0.2                     | 19 $\pm$ 0.2                     |  | 97.8 $\pm$ 0.2 | 97.8 $\pm$ 0.2                  | 97.8 $\pm$ 0.2                  |
| ER          | 78.9 $\pm$ 1.5 | 82.6 $\pm$ 1.0                   | 81.3 $\pm$ 1.9                   |  | 19.1 $\pm$ 2.0 | 14.0 $\pm$ 1.1                  | 15.8 $\pm$ 2.7                  |
| ER-MIR      | 81.5 $\pm$ 1.9 | <b>87.4 <math>\pm</math> 0.8</b> | <b>87.4 <math>\pm</math> 1.2</b> |  | 15.9 $\pm$ 2.5 | <b>7.2 <math>\pm</math> 0.9</b> | <b>6.7 <math>\pm</math> 1.4</b> |

Table 4: MNIST results. Memories per class  $M$ , we report the (a) Accuracy (b) Forgetting (lower is better). For larger sizes of memory ER-MIR has better accuracy and improved forgetting metric. Each approach is run 20 times

|             | M=20           | M=50                             | M=100                            |  | M=20           | M=50           | M=100                            |
|-------------|----------------|----------------------------------|----------------------------------|--|----------------|----------------|----------------------------------|
| iid online  | 73.8 $\pm$ 1.2 | 73.8 $\pm$ 1.2                   | 73.8 $\pm$ 1.2                   |  | N/A            | N/A            | N/A                              |
| iid offline | 86.6 $\pm$ 0.5 | 86.6 $\pm$ 0.5                   | 86.6 $\pm$ 0.5                   |  | N/A            | N/A            | N/A                              |
| single      | 64.6 $\pm$ 1.7 | 64.6 $\pm$ 1.7                   | 64.6 $\pm$ 1.7                   |  | 15.2 $\pm$ 1.9 | 15.2 $\pm$ 1.9 | 15.2 $\pm$ 1.9                   |
| ER          | 76.3 $\pm$ 0.6 | 78.4 $\pm$ 0.5                   | 79.9 $\pm$ 0.3                   |  | 5.6 $\pm$ 0.6  | 3.7 $\pm$ 0.5  | 2.48 $\pm$ 0.5                   |
| ER-MIR      | 76.3 $\pm$ 0.5 | <b>80.1 <math>\pm</math> 0.3</b> | <b>82.3 <math>\pm</math> 0.2</b> |  | 6.5 $\pm$ 0.5  | 3.4 $\pm$ 0.3  | <b>1.89 <math>\pm</math> 0.3</b> |

Table 5: Permuted MNIST results. Memories per class  $M$ , we report the (a) Accuracy (b) Forgetting (lower is better). For larger sizes of memory ER-MIR has better accuracy and improved forgetting metric. Each approach is run 10 times

## A Full Results on ER-MIR

In this section we show full results on the ER-MIR for different settings of the buffer size for Permuted MNIST and MNIST Split. We also include results for CIFAR-10 with 1000 samples per task as studied in [3]. We note that the margins of gain for ER-MIR is lower here than in the full CIFAR-10 setting (using 9750 samples per task) suggesting ER-MIR is more effective in the more challenging settings.

## B Details of Hyperparameters

### B.1 Experience Replay Experiments

For ER and ER-MIR we use the same base settings as in [3, 8]. Specifically the batch size is 10 for the ncoming samples and 10 for the buffered samples. As in that work we use a learning rate of 0.05 for our MNIST experiments. For CIFAR-10 we select by validation 0.1. ER-reservoir-MIR we also add the hyperparameter of the initial sampling size,  $C$ , which is chosen from 30, 50, 100, 150 to be 50.

For MNIST we use a 2 layer MLP with 400 hidden nodes. For CIFAR-10 experiments we use a standard Resnet-18 used in [25, 6].

### B.2 Generative Modeling Experiments

Regarding the VAE used for generative replays: the encoder/decoder are 2 layers gated MLP networks with 400 hidden nodes and ReLU activations; the latent space size is 50 dimensions for MNSIT Split and 100 for Permuted MNSIT. To achieve the best possible baseline (GEN), here are some hyperameters we searched for: learning rate, dropout, the weight of the  $KL(q(z|x)||p(z))$  in the loss and KL cost annealing shcedules. For GEN-MIR, we also searched for the weights of each loss in our proposed solutions e.g.  $\lambda$ . To keep things fair, GEN and GEN-MIR where allowed the same amount of trials.

## C Further Description of Hybrid Approach

We give the algorithm block fully describing the method of Sec. 3.3.

---

**Algorithm 3: AE-MIR**


---

**Input:** Learning rate  $\alpha$ , Subset size  $C$ ; Budget  $\mathcal{B}$ , Gen. Epochs  $N_{\text{gen}}$

```

1 Initialize: Memory  $\mathcal{M}$ ;  $\theta, \theta_{ae}$ 
2 for  $t \in 1..T$  do
3   %%Offline Generator Training
4   for  $epoch \in 1..N_{\text{gen}}$  do
5     for  $B_n \sim D_t$  do
6        $h \leftarrow \text{Encode}(\theta_{ae}; B_n)$ 
7        $\tilde{B}_n \leftarrow \text{Decode}(\theta_{ae}; h)$ 
8        $\text{loss}_{ae} \leftarrow \text{MSE}(\tilde{B}_n, B_n)$ 
9        $\text{Adam}(\text{loss}_{ae}, \theta_{ae})$ 
10    end
11  end
12  for  $B_n \sim D_t$  do
413    %%Virtual Update
14     $\theta_v \leftarrow \text{SGD}(B_n, \alpha)$ 
15    %%Autoencode batch
16     $h \leftarrow \text{Encode}(\theta_{ae}; B_n)$ 
17     $\tilde{B}_n \leftarrow \text{Decode}(\theta_{ae}; h)$ 
18    %%Select C samples
19     $B_C \sim \mathcal{M}$ 
20     $B_G \leftarrow \text{Retrieve samples acc. to Eq 1}$ 
21    %%Store compressed rep.
22     $\mathcal{M} \leftarrow \text{UpdateMemory}(h, L_n)$ 
23    %% Train the Classifier
24     $\theta \leftarrow \text{SGD}(\tilde{B}_n \cup B_{\mathcal{M}_C}, \alpha)$ 
25  end
26 end

```

---

414 For all experiments, we train the generator offline for 5 epochs, but still in the incremental setting. As  
 415 in the replay experiments, the batch size is 10. All results are averaged over 5 runs.

416 **Ablation Study** Here we provide results for the AE hybrid approach. We first change the test set  
 417 evaluation, by feeding the real images, instead of autoencoded ones. We denote this model as “-  
 418 test AE”. We also look at additionally feeding real images from the current data stream, instead of  
 419 reconstructed ones (i.e. replacing line 24  $\theta \leftarrow \text{SGD}(\tilde{B}_n \cup B_{\mathcal{M}_C}, \alpha)$  as  $\theta \leftarrow \text{SGD}(B_n \cup B_{\mathcal{M}_C}, \alpha)$ ).  
 420 We call this model “- train & test AE”.

421 From these results we see that *never* training the classifier on real images is essential to obtain good  
 422 results, as “- train & test AE” performs badly. Moreover, we notice that also autoencoding the data at

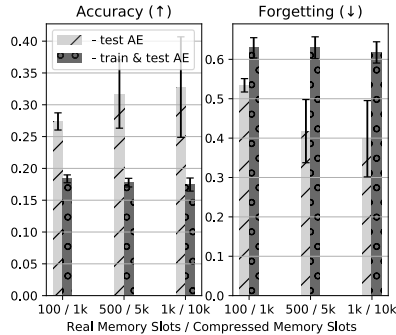

Figure 7: Ablation results

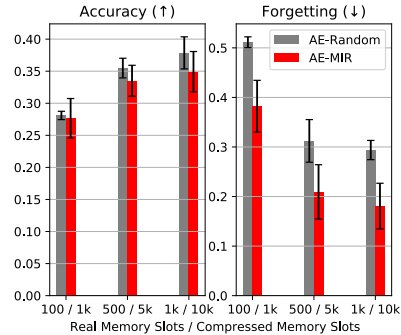

Figure 8: Reference Performance

423 test time is also responsible for some performance gain. This is denoted by the small but noticeable  
424 performance increase from “- test AE” to “AE-Random”
